# Supplementary material for: At What Age Could Screening for Familial Retinoblastoma Be Discontinued? A Systematic Review
Source: MDPI journal article supplement (doi:10.3390/cancers13081942), 2021-04-17
Supplement: s1 [file s1]

Commentary

# Supplementary Material: At What Age Could Screening for Familial Retinoblastoma be Discontinued? A Systematic Review.

Milo van Hoefen Wijsard <sup>1,\*</sup>, Saskia H. Serné <sup>1,†</sup>, René H. Otten <sup>2</sup>, Machteld I. Bosscha <sup>1</sup>, Charlotte J. Dommering <sup>3</sup>, Armida W. Fabius <sup>1</sup> and Annette C. Moll <sup>1</sup>

## Literature search strategy

**Table S1.** PubMed search on Feb 12 2021 (661).

| Search | Query                                                                                                                                                                                                                                                                                                                                                                              | Results                 |
|--------|------------------------------------------------------------------------------------------------------------------------------------------------------------------------------------------------------------------------------------------------------------------------------------------------------------------------------------------------------------------------------------|-------------------------|
| #15    | #14 NOT [611 PMIDs]                                                                                                                                                                                                                                                                                                                                                                | 50                      |
| #14    | #7 OR #9 OR #11 OR #13                                                                                                                                                                                                                                                                                                                                                             | <a href="#">661</a>     |
| #13    | #5 AND #12                                                                                                                                                                                                                                                                                                                                                                         | <a href="#">301</a>     |
| #12    | "Age Factors"[Mesh:NoExp] OR "Age of Onset"[Mesh] OR "age at detection"[tiab] OR "age at diagnosis"[tiab] OR "age at onset"[tiab] OR "age at presentation"[tiab] OR "age of detection"[tiab] OR "age of diagnosis"[tiab] OR "age of onset"[tiab] OR "age of presentation"[tiab] OR "detection age"[tiab] OR "diagnosis age"[tiab] OR "onset age"[tiab] OR "presentation age"[tiab] | <a href="#">539,778</a> |
| #11    | #5 AND #10                                                                                                                                                                                                                                                                                                                                                                         | <a href="#">91</a>      |
| #10    | "Registries"[Mesh] OR registry[tiab] OR registries[tiab] OR register[tiab] OR registers[tiab]                                                                                                                                                                                                                                                                                      | <a href="#">244,265</a> |
| #9     | #5 AND #8                                                                                                                                                                                                                                                                                                                                                                          | <a href="#">136</a>     |
| #8     | "Early Diagnosis"[Mesh] OR early diagnos*[tiab] OR early detect*[tiab]                                                                                                                                                                                                                                                                                                             | <a href="#">188,186</a> |
| #7     | #5 AND #6                                                                                                                                                                                                                                                                                                                                                                          | <a href="#">239</a>     |
| #6     | "Mass Screening"[Mesh] OR screen*[tiab]                                                                                                                                                                                                                                                                                                                                            | <a href="#">834,559</a> |
| #5     | #3 OR #4                                                                                                                                                                                                                                                                                                                                                                           | <a href="#">3,468</a>   |
| #4     | "Retinoblastoma/congenital"[Mesh] OR "Retinoblastoma/genetics"[Mesh]                                                                                                                                                                                                                                                                                                               | <a href="#">2,301</a>   |
| #3     | #1 AND #2                                                                                                                                                                                                                                                                                                                                                                          | <a href="#">1,844</a>   |
| #2     | familial[tiab] OR hereditary[tiab] OR inheritable[tiab] OR bilateral[tiab]                                                                                                                                                                                                                                                                                                         | <a href="#">438,509</a> |
| #1     | "Retinoblastoma"[Mesh] OR Retinoblastoma*[tiab] OR Retinal Neuroblastoma*[tiab] OR Retinal Glioma*[tiab] OR "Retinal                                                                                                                                                                                                                                                               | <a href="#">18,066</a>  |

---

Glioblastoma"[tiab] OR "Retinal  
Glioblastomas"[tiab]

---

Final search highlighted in yellow.

**Table S2.** Embase.com search on Feb 12 2021 (736).

| No. | Query                                                                                                                                                              | Results |
|-----|--------------------------------------------------------------------------------------------------------------------------------------------------------------------|---------|
| #15 | #14 NOT [656 PUIs]                                                                                                                                                 | 81      |
| #14 | #7 OR #9 OR #11 OR #13                                                                                                                                             | 736     |
| #13 | #5 AND #12                                                                                                                                                         | 324     |
| #12 | 'onset age'/exp OR ((age NEAR/4 detection):ti,ab,kw) OR ((age NEAR/4 diagnosis):ti,ab,kw) OR ((age NEAR/4 onset):ti,ab,kw) OR ((age NEAR/4 presentation):ti,ab,kw) | 225804  |
| #11 | #5 AND #10                                                                                                                                                         | 83      |
| #10 | 'register'/exp OR registry:ti,ab,kw OR registries:ti,ab,kw OR registers:ti,ab,kw                                                                                   | 349612  |
| #9  | #5 AND #8                                                                                                                                                          | 167     |
| #8  | 'early diagnosis'/exp OR 'early diagnos*':ti,ab,kw OR 'early detect*':ti,ab,kw                                                                                     | 267776  |
| #7  | #5 AND #6                                                                                                                                                          | 308     |
| #6  | 'mass screening'/exp OR screen*:ti,ab,kw                                                                                                                           | 1220728 |
| #5  | #3 OR #4                                                                                                                                                           | 2556    |
| #4  | 'retinoblastoma'/exp/dm_cn                                                                                                                                         | 169     |
| #3  | #1 AND #2                                                                                                                                                          | 2466    |
| #2  | familial:ti,ab,kw OR hereditary:ti,ab,kw OR inheritable:ti,ab,kw OR bilateral:ti,ab,kw                                                                             | 613579  |
| #1  | 'retinoblastoma'/exp OR retinoblastoma*:ti,ab,kw OR 'retinal neuroblastoma*':ti,ab,kw OR 'retinal glioma*':ti,ab,kw OR 'retinal glioblastoma*':ti,ab,kw            | 23402   |

Final search highlighted in yellow.

**Table S3.** Ebsco/CINAHL search on Feb 12 2021 (105).

| #   | Query                                                                                                                                                                                                                                                                                                                                   | Results |
|-----|-----------------------------------------------------------------------------------------------------------------------------------------------------------------------------------------------------------------------------------------------------------------------------------------------------------------------------------------|---------|
| S13 | S12 NOT [661 PMIDs]                                                                                                                                                                                                                                                                                                                     | 41      |
| S12 | S5 OR S7 OR S9 OR S11                                                                                                                                                                                                                                                                                                                   | 105     |
| S11 | S3 AND S10                                                                                                                                                                                                                                                                                                                              | 35      |
| S10 | (MH "Age Factors") OR (MH "Age of Onset") OR TI ((age N3 detection) OR (age N3 diagnosis) OR (age N3 onset) OR (age N3 presentation)) OR AB ((age N3 detection) OR (age N3 diagnosis) OR (age N3 onset) OR (age N3 presentation)) OR SU ((age N3 detection) OR (age N3 diagnosis) OR (age N3 onset) OR (age N3 presentation))           | 166,856 |
| S9  | S3 AND S8                                                                                                                                                                                                                                                                                                                               | 15      |
| S8  | (MH "Registries, Disease") OR TI ("registry" OR "registries" OR "register" OR "registers") OR AB ("registry" OR "registries" OR "register" OR "registers") OR SU ("registry" OR "registries" OR "register" OR "registers")                                                                                                              | 81,337  |
| S7  | S3 AND S6                                                                                                                                                                                                                                                                                                                               | 31      |
| S6  | (MH "Early Diagnosis+") OR TI ("early diagnos*" OR "early detect*") OR AB ("early diagnos*" OR "early detect*") OR SU ("early diagnos*" OR "early detect*")                                                                                                                                                                             | 44,682  |
| S5  | S3 AND S4                                                                                                                                                                                                                                                                                                                               | 51      |
| S4  | (MH "Health Screening+") OR TI (screen*) OR AB (screen*) OR SU (screen*)                                                                                                                                                                                                                                                                | 229,321 |
| S3  | S1 AND S2                                                                                                                                                                                                                                                                                                                               | 283     |
| S2  | TI (familial OR hereditary OR inheritable OR bilateral) OR AB (familial OR hereditary OR inheritable OR bilateral) OR SU (familial OR hereditary OR inheritable OR bilateral)                                                                                                                                                           | 108,612 |
| S1  | (MH "Retinoblastoma") OR TI ("Retinoblastoma*" OR "Retinal Neuroblastoma*" OR "Retinal Glioma*" OR "Retinal Glioblastoma*") OR AB ("Retinoblastoma*" OR "Retinal Neuroblastoma*" OR "Retinal Glioma*" OR "Retinal Glioblastoma*") OR SU ("Retinoblastoma*" OR "Retinal Neuroblastoma*" OR "Retinal Glioma*" OR "Retinal Glioblastoma*") | 1,515   |

Final search highlighted in yellow.

**Table S4.** Wiley/Cochrane Library search on Feb 12 2021 (3).

| ID  | Search                                                                                                                                  | Hits  |
|-----|-----------------------------------------------------------------------------------------------------------------------------------------|-------|
| #1  | ("Retinoblastoma*" OR (Retinal NEXT Neuroblastoma*) OR (Retinal NEXT Glioma*) OR (Retinal NEXT Glioblastoma*)):ti,ab,kw                 | 137   |
| #2  | familial:ti,ab,kw OR hereditary:ti,ab,kw OR inheritable:ti,ab,kw OR bilateral:ti,ab,kw                                                  | 23485 |
| #3  | #1 AND #2                                                                                                                               | 13    |
| #4  | screen*:ti,ab,kw                                                                                                                        | 74417 |
| #5  | #3 AND #4                                                                                                                               | 0     |
| #6  | (early NEXT diagnos*):ti,ab,kw OR (early NEXT detect*):ti,ab,kw                                                                         | 5523  |
| #7  | #3 AND #6                                                                                                                               | 0     |
| #8  | registry:ti,ab,kw OR registries:ti,ab,kw OR register:ti,ab,kw OR registers:ti,ab,kw                                                     | 29602 |
| #9  | #3 AND #8                                                                                                                               | 1     |
| #10 | (age NEAR/4 detection):ti,ab,kw OR (age NEAR/4 diagnosis):ti,ab,kw OR (age NEAR/4 onset):ti,ab,kw OR (age NEAR/4 presentation):ti,ab,kw | 6923  |
| #11 | #3 AND #10                                                                                                                              | 2     |
| #12 | #5 OR #7 OR #9 OR #11                                                                                                                   | 3     |

Final search highlighted in yellow.
